# Supplementary material for: The Use of Artificial Intelligence and Deep Learning in Medical Imaging: A Nationwide Survey of Trainees in Saudi Arabia
Source: Preprints.org preprint supplement (doi:10.20944/preprints202202.0338.v1), 2022-02-25
Supplement: Supplementary file 1 [file supplementary]

## Appendix A: Level of use of Artificial Intelligence/Deep Learning Radiology

| Level of use of AI/DL Radiology |                                                                                                                                                                                                                                               |
|---------------------------------|-----------------------------------------------------------------------------------------------------------------------------------------------------------------------------------------------------------------------------------------------|
| <b>LoU0</b>                     | I have no experience in <b>AI/DL Radiology</b> ; I have no significant knowledge about it and I am doing nothing towards becoming involved in it                                                                                              |
| <b>LoU1</b>                     | I have acquired or am acquiring information about <b>AI/DL Radiology</b> ; I am exploring its value and its demands upon physicians and health institutions                                                                                   |
| <b>LoU2</b>                     | I think I am ready for <b>AI/DL Radiology</b> implementation and am preparing for my first use                                                                                                                                                |
| <b>LoU3</b>                     | I have already made my first steps in <b>AI/DL Radiology</b> ; I am using it superficially or whenever I need it                                                                                                                              |
| <b>LoU4a</b>                    | I am using <b>AI/DL Radiology</b> in my routine practice but I have no idea about its impact on my patients or the quality of care                                                                                                            |
| <b>LoU4b</b>                    | I am using <b>AI/DL Radiology</b> and attempting to optimize my use to meet my patients' needs and or improve my clinical practice                                                                                                            |
| <b>LoU5</b>                     | I am using <b>AI/DL Radiology</b> and coordinating my efforts with other colleagues and health professionals for best effect on patient care                                                                                                  |
| <b>LoU6</b>                     | I am using <b>AI/DL Radiology</b> and I think there are some necessary modifications to the system to achieve increased impact of patients;<br>Or,<br>I am using <b>AI/DL Radiology</b> and I think its scope should be expanded to new goals |

## Appendix B: Opinions about the opportunities of artificial intelligence in radiology

| To what extent do you think Artificial intelligence, Machine learning, and Deep learning can or will impact the following steps of standard radiology workflow? |                                                                                                            |                  |                     |                  |                    |
|-----------------------------------------------------------------------------------------------------------------------------------------------------------------|------------------------------------------------------------------------------------------------------------|------------------|---------------------|------------------|--------------------|
|                                                                                                                                                                 | 1 ○ No impact                                                                                              | 2 ○ Small impact | 3 ○ Moderate impact | 4 ○ Large impact | 5 ○ Drastic impact |
| 01                                                                                                                                                              | Enhance clinical decision for imaging exam ordering by analyzing patient's electronic medical record (EMR) |                  |                     | 1 ○              | 2 ○ 3 ○ 4 ○ 5 ○    |
| 02                                                                                                                                                              | Optimize scheduling for patients and resources                                                             |                  |                     | 1 ○              | 2 ○ 3 ○ 4 ○ 5 ○    |
| 03                                                                                                                                                              | Enable automated protocol selection                                                                        |                  |                     | 1 ○              | 2 ○ 3 ○ 4 ○ 5 ○    |
| 04                                                                                                                                                              | Enhance image acquisition by improving image quality with less time and radiation                          |                  |                     | 1 ○              | 2 ○ 3 ○ 4 ○ 5 ○    |
| 05                                                                                                                                                              | Enable automated finding detection                                                                         |                  |                     | 1 ○              | 2 ○ 3 ○ 4 ○ 5 ○    |
| 06                                                                                                                                                              | Enable automated diagnosis generation and differential diagnosis augmentation                              |                  |                     | 1 ○              | 2 ○ 3 ○ 4 ○ 5 ○    |
| 07                                                                                                                                                              | Expedite abnormal image interpretation                                                                     |                  |                     | 1 ○              | 2 ○ 3 ○ 4 ○ 5 ○    |
| 08                                                                                                                                                              | Enhance structured reporting                                                                               |                  |                     | 1 ○              | 2 ○ 3 ○ 4 ○ 5 ○    |
| 09                                                                                                                                                              | Enhance communication of findings and guidance through EMR                                                 |                  |                     | 1 ○              | 2 ○ 3 ○ 4 ○ 5 ○    |
| 10                                                                                                                                                              | Optimize billing                                                                                           |                  |                     | 1 ○              | 2 ○ 3 ○ 4 ○ 5 ○    |

## Appendix C: Attitudes regarding AI Radiology impact on the Radiologist Profession

| How would the implementation of AI radiology impact each of the following aspects of the radiologist profession? |                                   |                 |  |                             |      |                 |      |                      |  |
|------------------------------------------------------------------------------------------------------------------|-----------------------------------|-----------------|--|-----------------------------|------|-----------------|------|----------------------|--|
| _____-(-2)_____                                                                                                  |                                   | _____-(-1)_____ |  | _____(0)_____               |      | _____(+1)_____  |      | _____(+2)_____       |  |
| Very negative impact                                                                                             |                                   | Negative impact |  | Mixed opinion, or no impact |      | Positive impact |      | Very positive impact |  |
| 01                                                                                                               | Medical Imaging Ethics            |                 |  | -2 ○                        | -1 ○ | 0 ○             | +1 ○ | +2 ○                 |  |
| 02                                                                                                               | Medical liability of radiologists |                 |  | -2 ○                        | -1 ○ | 0 ○             | +1 ○ | +2 ○                 |  |
| 03                                                                                                               | Quality of image acquisition      |                 |  | -2 ○                        | -1 ○ | 0 ○             | +1 ○ | +2 ○                 |  |
| 04                                                                                                               | Accuracy of image interpretation  |                 |  | -2 ○                        | -1 ○ | 0 ○             | +1 ○ | +2 ○                 |  |
| 05                                                                                                               | Wait times and appointment delays |                 |  | -2 ○                        | -1 ○ | 0 ○             | +1 ○ | +2 ○                 |  |
| 06                                                                                                               | Work load in radiology            |                 |  | -2 ○                        | -1 ○ | 0 ○             | +1 ○ | +2 ○                 |  |
| 07                                                                                                               | Radiologist's role in society     |                 |  | -2 ○                        | -1 ○ | 0 ○             | +1 ○ | +2 ○                 |  |
| 08                                                                                                               | Radiologist's income              |                 |  | -2 ○                        | -1 ○ | 0 ○             | +1 ○ | +2 ○                 |  |
| 09                                                                                                               | Radiologist's training and skills |                 |  | -2 ○                        | -1 ○ | 0 ○             | +1 ○ | +2 ○                 |  |
| 10                                                                                                               | Radiologist's job satisfaction    |                 |  | -2 ○                        | -1 ○ | 0 ○             | +1 ○ | +2 ○                 |  |

**Appendix D:** Perceived ease of use (PEoU) and behavioral intention (BI) of AI radiology use in routine practice

| Please rate your level of agreement to the following statements: |                                                                                                            |          |               |       |                 |             |
|------------------------------------------------------------------|------------------------------------------------------------------------------------------------------------|----------|---------------|-------|-----------------|-------------|
|                                                                  | 1                                                                                                          | 2        | 3             | 4     | 5               |             |
|                                                                  | Extremely disagree                                                                                         | Disagree | I do not know | Agree | Extremely agree |             |
| <b>PEoU1</b>                                                     | Understanding the principles of <b>AI Radiology</b> would be easy for me                                   |          |               | 1 ○   | 2 ○             | 3 ○ 4 ○ 5 ○ |
| <b>PEoU2</b>                                                     | Learning to operate <b>AI Radiology</b> would be easy for me                                               |          |               |       |                 |             |
| <b>PEoU3</b>                                                     | I would find it easy to do all what I need to do in my practice using <b>AI Radiology</b>                  |          |               | 1 ○   | 2 ○             | 3 ○ 4 ○ 5 ○ |
| <b>BI1</b>                                                       | Assuming I have access to the system, I intend to use <b>AI Radiology</b>                                  |          |               | 1 ○   | 2 ○             | 3 ○ 4 ○ 5 ○ |
| <b>BI2</b>                                                       | To the extent possible, I intend to use <b>AI/DL</b> technology in all dimensions of my radiology practice |          |               | 1 ○   | 2 ○             | 3 ○ 4 ○ 5 ○ |
| <b>BI3</b>                                                       | I intend to encourage my colleagues to use <b>AI Radiology</b>                                             |          |               | 1 ○   | 2 ○             | 3 ○ 4 ○ 5 ○ |
